# Supplementary material
Source: Royal Society of Chemistry journal article supplement (doi:10.1039/d6cp00702c)
Supplement: d6cp00702c2.pdf [file d6cp00702c2.pdf]

## Supplementary Information for:

### **Surface curvature effects in neutral and protonated water clusters: insights from DFT and energy decomposition analysis†**

Murillo H. Queiroz<sup>ab</sup>, Bruno S. Sampaio<sup>a</sup>, Celine Nieuwland<sup>b</sup>, Célia Fonseca Guerra<sup>b</sup>,  
Tiago V. Alves<sup>a</sup>, Roberto Rivelino<sup>\*c</sup>

<sup>a</sup> Departamento de Físico-Química, Instituto de Química, Universidade Federal da Bahia  
Rua Barão de Jeremoabo, 147, 40170-115, Salvador, Bahia, Brazil

<sup>b</sup> Department of Chemistry and Pharmaceutical Sciences, Amsterdam Institute for  
Molecular and Life Sciences (AIMMS), Vrije Universiteit Amsterdam, De Boelelaan  
1108, 1081 HZ Amsterdam, The Netherlands

<sup>c</sup> Instituto de Física, Universidade Federal da Bahia, 40210-340 Salvador, Bahia, Brazil

\*Corresponding authors. E-mail: rivelino@ufba.br

## Voronoi Deformation Density (VDD) Charge Analysis for Complexes

The VDD method<sup>62</sup> provides a way to assess how electron density is redistributed upon complex formation. In this context, the change in atomic charge ( $\Delta Q_A$ ) for a given atom A in fragment  $i$  is obtained by integrating the deformation density over the Voronoi cell of atom A. This deformation density is defined as the difference between the total electron density of the complex,  $\rho(r)$ , and the sum of the densities of the isolated fragments,  $\sum_{fragment,i} \rho_i(r)$ :

$$\Delta Q_A = - \int_{\text{Voronoi cell of A in the complex}} \left[ \rho(r) - \sum_{fragment,i} \rho_i(r) \right]$$

This analysis shows how the interaction between fragments alters the local electron density around atom A. Summing  $\Delta Q_A$  over all atoms in fragment  $i$  gives the total charge transfer associated with that fragment: a negative value ( $\Delta Q_{fragment,i} < 0$ ) indicates net electron gain, while a positive value ( $\Delta Q_{fragment,i} > 0$ ) indicates net electron loss due to complex formation.

$$\Delta Q_{fragment,i} = \sum_{A \text{ in fragment}} \Delta Q_A$$

## Non-Covalent Interactions

Non-Covalent Interactions (NCI)<sup>S1</sup> plots are based on the gradients of electron density are provided to identify and visualize weak interactions through color-coded isosurfaces.

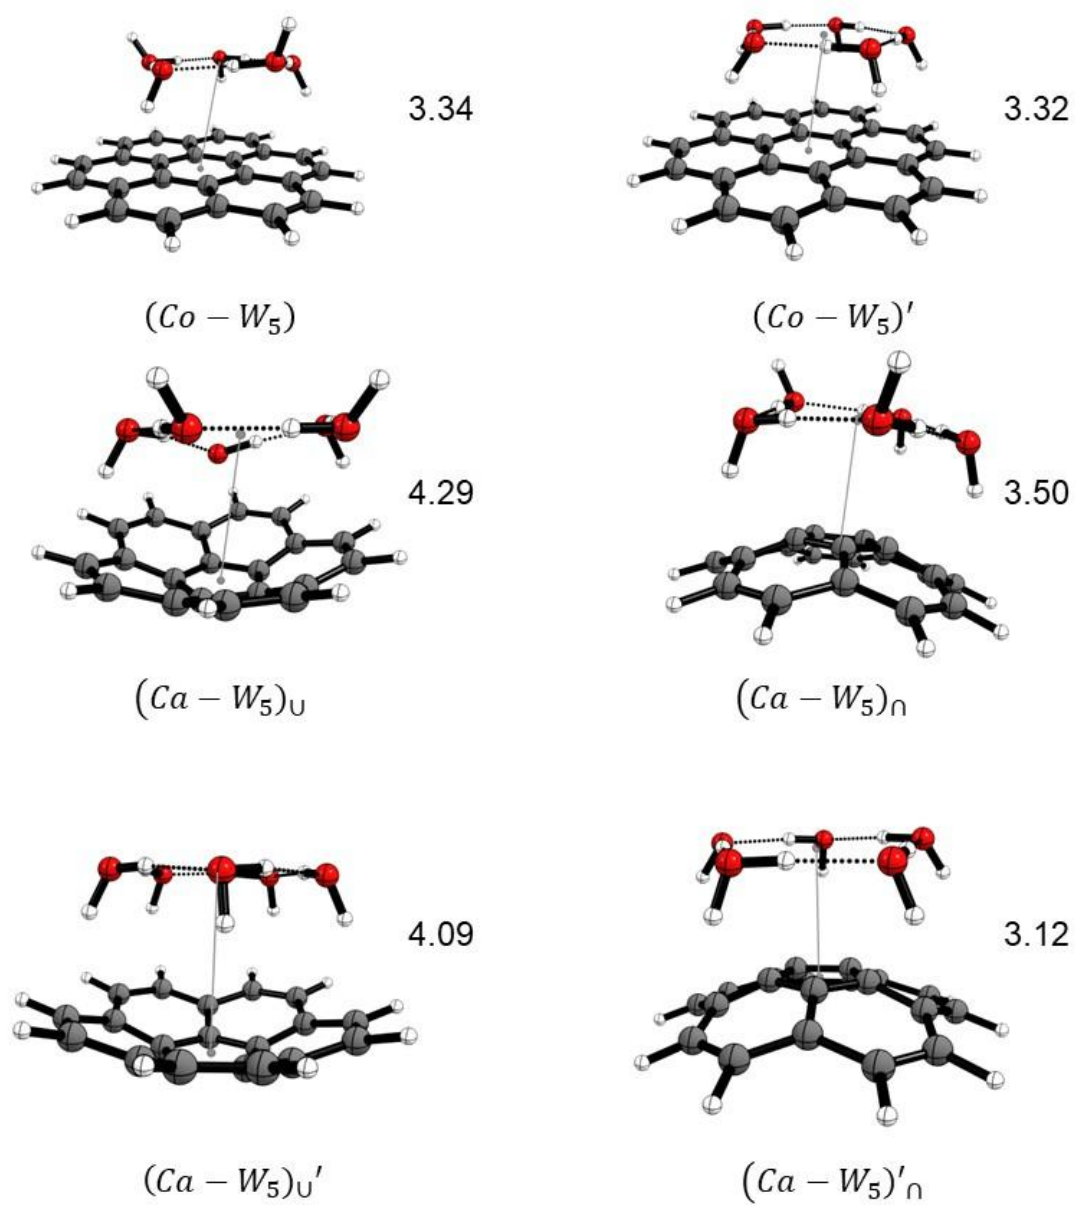

**Figure S1.** B3LYP-D3(BJ)/def2-TZVP optimized structures of the neutral water cluster–PAH complexes. Values in black are the intercluster distances ( $Co/Ca \cdots W_5$ ) in Å.

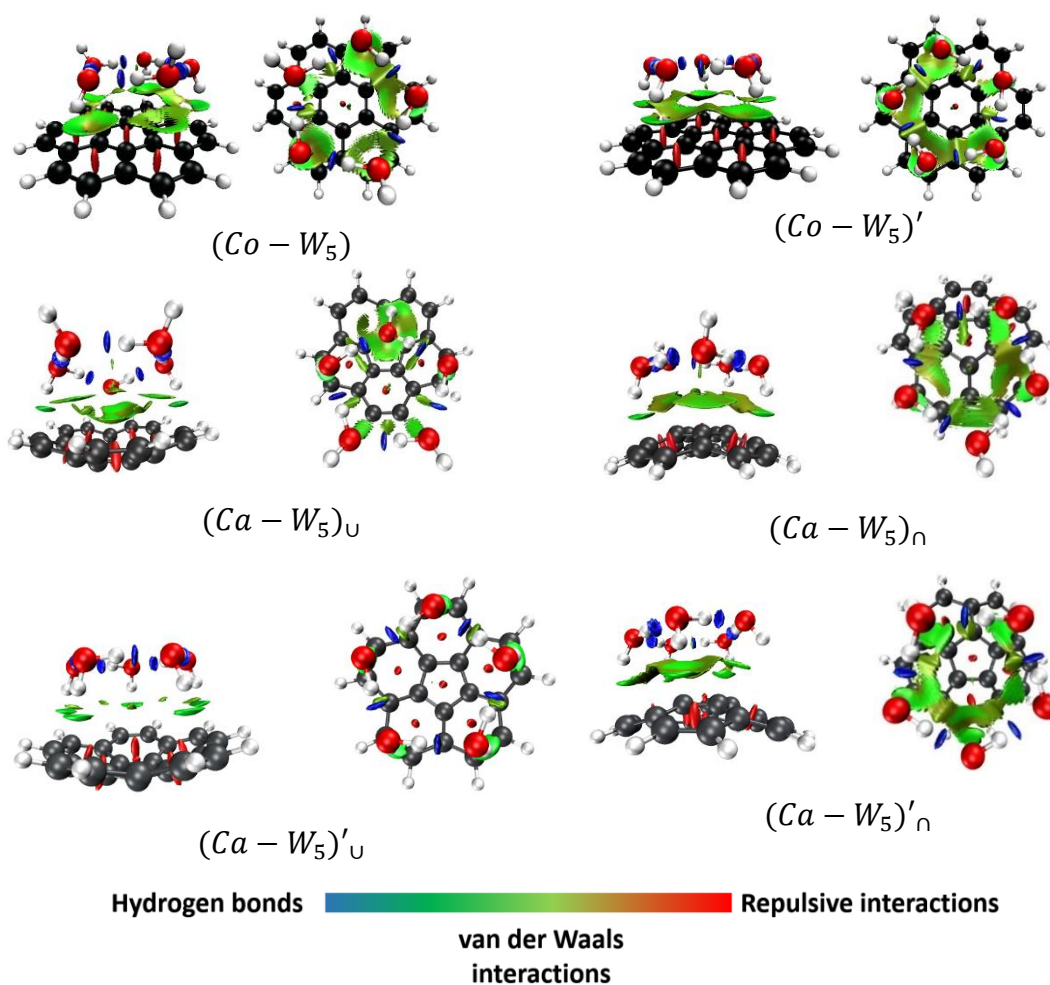

**Figure S2.** Optimized structures and NCI analysis for the neutral complexes involving water pentamers and corannulene. Blue, green, and red electron density regions denote conventional H-bonds, dispersion, and repulsive interactions, respectively (reduced densities isovalue contours value = 0.5). We display side view (left) and top view (right) of each complex for clarity.

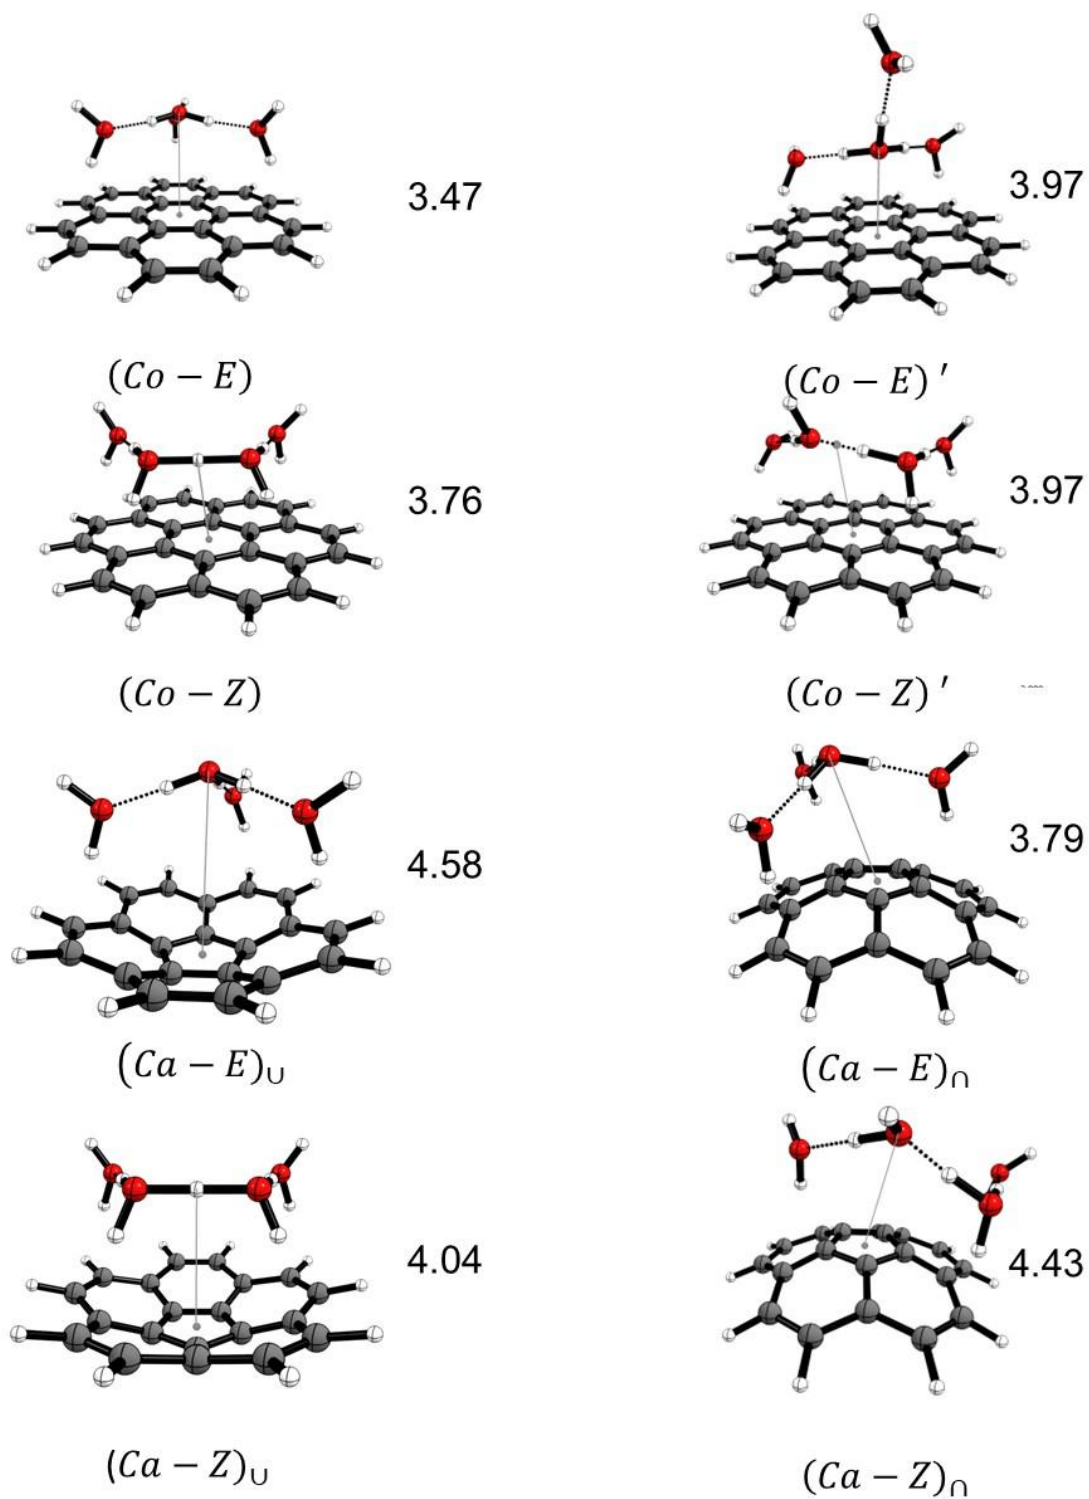

**Figure S3.** Some optimized structures of the cationic water cluster-PAH complexes with B3LYP-D3(BJ)/def2-TZVP. Values in black are the interclusters ( $Co/Ca \cdots E/Z$ ) distances in Å.

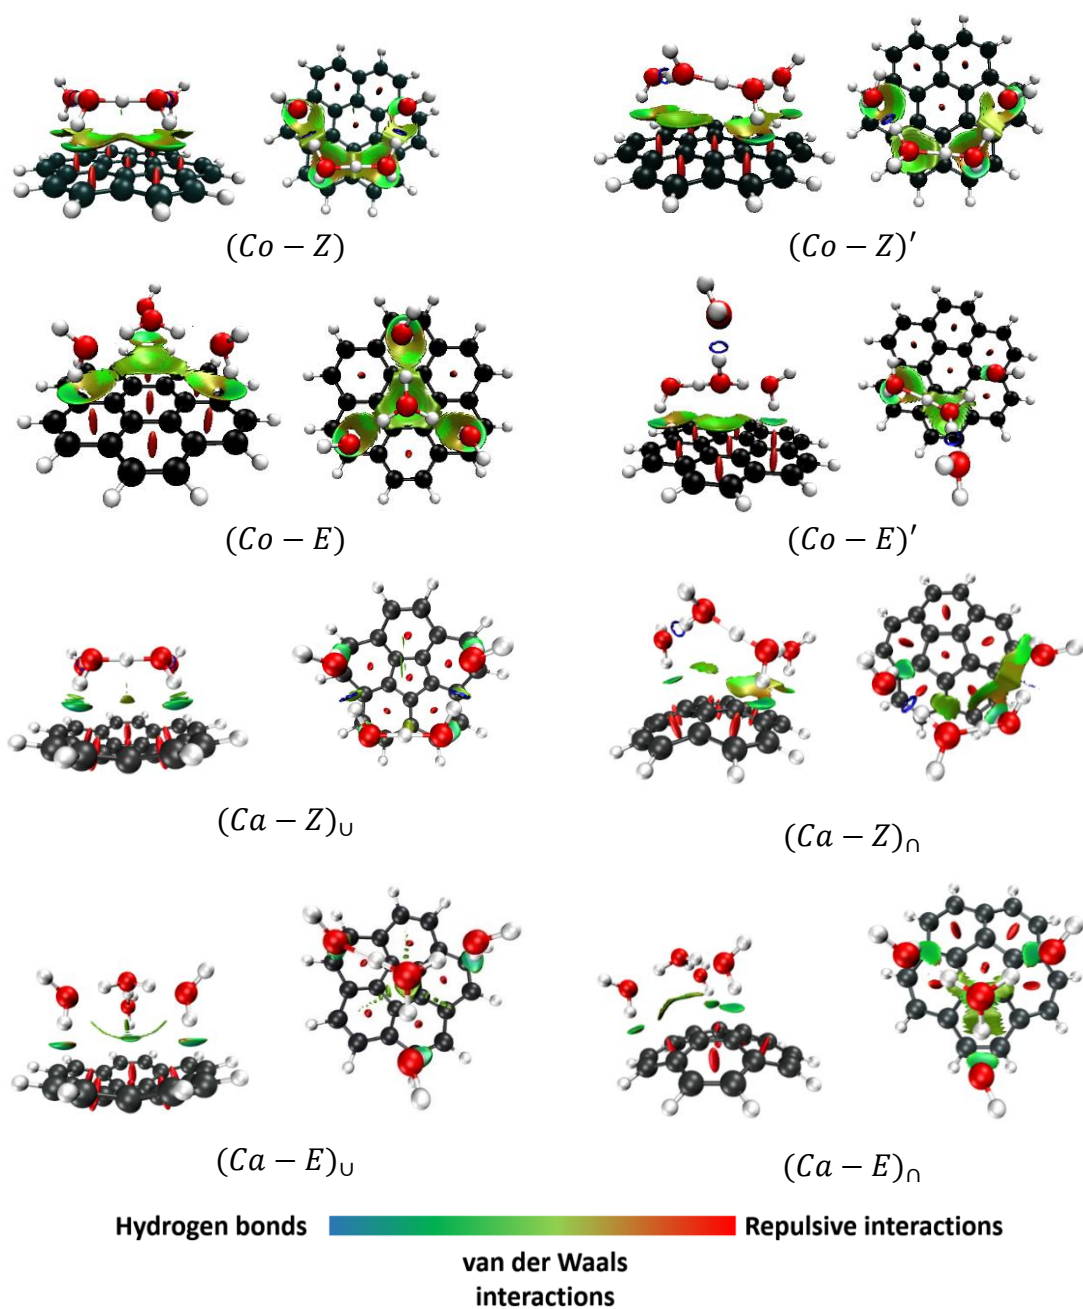

**Figure S4.** Some optimized structures with B3LYP-D3(BJ)/def2-TZVP and NCI analysis for the complexes involving Zundel and Eigen cations. Green and red electron density regions denote dispersion and repulsive interactions, respectively (reduced densities isovalue contours value = 0.5). We display side view (left) and top view (right) of each complex for clarity.

**Table S1.** Bond, interaction, and strain energies (in kcal mol<sup>-1</sup>) of the neutral water cluster–PAH complexes calculated at M06-2X/TZ2P.<sup>a</sup>

| System                               | $\Delta E_{bond}^a$ | $\Delta E_{int}$ | $\Delta E_{strain}^b$ | $\Delta E_{strain}^{PAH}$ | $\Delta E_{strain}^{W_5}$ |
|--------------------------------------|---------------------|------------------|-----------------------|---------------------------|---------------------------|
| (Co – W <sub>5</sub> )               | -10.6               | -11.2            | 0.6                   | 0.3                       | 0.3                       |
| (Co – W <sub>5</sub> )'              | -10.9               | -14.5            | 3.6                   | 0.3                       | 3.3                       |
| (Ca – W <sub>5</sub> ) <sub>∪</sub>  | -9.1                | -11.5            | 2.5                   | 0.4                       | 2.1                       |
| (Ca – W <sub>5</sub> ) <sub>∩</sub>  | -8.2                | -8.9             | 0.7                   | 0.3                       | 0.4                       |
| (Ca – W <sub>5</sub> )' <sub>∪</sub> | -6.5                | -12.1            | 5.6                   | 0.2                       | 5.4                       |
| (Ca – W <sub>5</sub> )' <sub>∩</sub> | -7.2                | -11.5            | 4.3                   | 0.6                       | 3.7                       |

$$^a \Delta E_{bond} = \Delta E_{strain} + \Delta E_{int} \quad ^b \Delta E_{strain} = \Delta E_{strain}^{PAH} + \Delta E_{strain}^{W_5}$$

**Table S2.** EDA components (in kcal mol<sup>-1</sup>) for the neutral water cluster–PAH complexes calculated at M06-2X/TZ2P.<sup>a</sup>

| System                               | $\Delta E_{int}$ | $\Delta V_{elstat}$ | $\Delta E_{Pauli}$ | $\Delta E_{oi}$ |
|--------------------------------------|------------------|---------------------|--------------------|-----------------|
| (Co – W <sub>5</sub> )               | -11.2            | -9.5                | 4.9                | -6.5            |
| (Co – W <sub>5</sub> )'              | -14.5            | -13.2               | 5.9                | -7.3            |
| (Ca – W <sub>5</sub> ) <sub>∪</sub>  | -11.5            | -11.6               | 6.3                | -6.1            |
| (Ca – W <sub>5</sub> ) <sub>∩</sub>  | -8.9             | -8.4                | 4.6                | -5.1            |
| (Ca – W <sub>5</sub> )' <sub>∪</sub> | -12.1            | -14.0               | 10.3               | -8.4            |
| (Ca – W <sub>5</sub> )' <sub>∩</sub> | -11.5            | -11.8               | 5.2                | -5.0            |

$$^a \Delta E_{int} = \Delta V_{elstat} + \Delta E_{Pauli} + \Delta E_{oi}$$

**Table S3.** Bond, interaction, and strain energies (in kcal mol<sup>-1</sup>) of the cationic water cluster–PAH complexes calculated at M06-2X/TZ2P.

| System                | $\Delta E_{bond}^a$ | $\Delta E_{int}$ | $\Delta E_{strain}^b$ | $\Delta E_{strain}^{PAH}$ | $\Delta E_{strain}^{Z/E}$ |
|-----------------------|---------------------|------------------|-----------------------|---------------------------|---------------------------|
| (Co – E)              | -24.8               | -25.8            | 1.0                   | 0.1                       | 0.9                       |
| (Co – Z)              | -26.4               | -29.4            | 2.9                   | 0.2                       | 2.7                       |
| (Ca – Z) <sub>∪</sub> | -20.3               | -24.9            | 4.6                   | 0.8                       | 3.8                       |
| (Ca – Z) <sub>∩</sub> | -21.6               | -23.9            | 2.3                   | 0.1                       | 2.2                       |
| (Ca – E) <sub>∪</sub> | -17.1               | -19.4            | 2.2                   | 0.5                       | 1.7                       |
| (Ca – E) <sub>∩</sub> | -22.4               | -24.3            | 2.0                   | 0.2                       | 1.8                       |

$$^a \Delta E_{bond} = E_{PAH-Z/E} - E_{PAH} - E_{Z/E} \quad (\text{Note that the bonding energy of each cationic complex is computed with respect to the Eigen or Zundel cation}). \quad ^b \Delta E_{strain} = \Delta E_{strain}^{PAH} + \Delta E_{strain}^{Z/E}$$

**Table S4.** EDA components (in kcal mol<sup>-1</sup>) for the neutral water cluster–PAH complexes calculated at M06-2X/TZ2P.<sup>a</sup>

| System                | $\Delta E_{\text{int}}$ | $\Delta V_{\text{elstat}}$ | $\Delta E_{\text{Pauli}}$ | $\Delta E_{\text{oi}}$ |
|-----------------------|-------------------------|----------------------------|---------------------------|------------------------|
| (Co – E)              | -25.8                   | -17.5                      | 9.1                       | -17.3                  |
| (Co – Z)              | -29.4                   | -19.8                      | 10.3                      | -19.8                  |
| (Ca – Z) <sub>∪</sub> | -24.9                   | -19.2                      | 15.4                      | -21.1                  |
| (Ca – Z) <sub>∩</sub> | -23.9                   | -16.5                      | 8.8                       | -16.2                  |
| (Ca – E) <sub>∪</sub> | -19.4                   | -14.6                      | 12.4                      | -17.1                  |
| (Ca – E) <sub>∩</sub> | -24.3                   | -17.0                      | 9.3                       | -16.6                  |

<sup>a</sup>  $\Delta E_{\text{int}} = \Delta V_{\text{elstat}} + \Delta E_{\text{Pauli}} + \Delta E_{\text{oi}}$

**Table S5.** Calculated lower-frequency vibrational modes (in cm<sup>-1</sup>) of the Eigen cation.

| Mode                                   | This work | MCTDH <sup>a</sup> | Expt. 1 <sup>b</sup> | Expt. 2 <sup>c</sup> |
|----------------------------------------|-----------|--------------------|----------------------|----------------------|
| Global O <sub>4</sub> pyramidalization | 66.2      | 60                 | -                    | -                    |
| Water ligand wagging                   | 242.9     | 240                | -                    | 236                  |
| O-O stretching                         | 279.5     | 310                | -                    | 316                  |
| Water ligand rocking                   | 343.8     | 370                | -                    | -                    |
| Hydronium wagging                      | 990.8     | 920                | -                    | 894                  |
| Hydronium umbrella                     | 1165.9    | 970                | -                    | 1014                 |
| OH-bend water ligands                  | 1637.4    | 1620               | 1615                 | 1615                 |
| Hydronium O-H stretch                  | 2974.0    | 2670               | 2653                 | -                    |
| Symmetric OH-stretch water ligands     | 3779.0    | 3670               | 3636                 | -                    |
| Asymmetric OH-stretch water ligands    | 3870.7    | 3800               | 3724                 | -                    |

<sup>a</sup> Simulations from ref. 72 in the main manuscript; <sup>b</sup> experimental data from supplementary ref. [2]; and <sup>c</sup> Experimental data from supplementary ref. [3]

**Table S6.** Calculated fundamentals (in  $\text{cm}^{-1}$ ) of the Zundel/Eigen complexes with coronene and corannulene in comparison with the isolated cations. The shifts are given in parentheses.

| Assignment                                                      | $E$    | $(Co - E)$      | $(Co - E')$     |
|-----------------------------------------------------------------|--------|-----------------|-----------------|
| Hydronium umbrella                                              | 1166.0 | 1117.2 (-48.8)  | 1229.9 (63.9)   |
| Hydronium + 2H <sub>2</sub> O bending                           | 1623.1 | 1606.5 (-16.6)  | 1612.1 (-11.0)  |
| Hydronium + 2H <sub>2</sub> O bending                           | 1623.3 | 1606.9 (-16.4)  | 1616.3 (-7.0)   |
| Water ligand O-H bending                                        | 1637.4 | 1627.2 (-10.2)  | 1631.8 (-5.6)   |
| Hydronium bending                                               | 1687.5 | 1687.6 (0.1)    | 1707.0 (19.5)   |
| Hydronium bending                                               | 1688.0 | 1688.8 (0.8)    | 1741.3 (53.3)   |
| Hydronium asym. O-H stretching                                  | 2839.4 | 2759.9 (-79.5)  | 2551.4 (-288.0) |
| Hydronium asym. O-H stretching                                  | 2839.7 | 2764.1 (-75.6)  | 2747.3 (-92.4)  |
| Hydronium sym. O-H stretching                                   | 2974.0 | 2918.7 (-55.3)  | 3082.0 (108.0)  |
| Assignment                                                      | $E$    | $(Ca - E)_U$    | $(Ca - E)_N$    |
| Hydronium umbrella                                              | 1166.0 | 1297.9 (+131.9) | 1284.0 (+118.0) |
| Hydronium + 2H <sub>2</sub> O bending                           | 1623.1 | 1610.6 (-12.7)  | 1594.3 (-28.8)  |
| Hydronium + 2H <sub>2</sub> O bending                           | 1623.3 | 1623.3 (0.0)    | 1618.7 (-4.6)   |
| Water ligand O-H bending                                        | 1637.4 | 1620.0 (-1.5)   | 1603.2 (-34.2)  |
| Hydronium bending                                               | 1687.5 | 1680.1 (-7.4)   | 1706.8 (+19.3)  |
| Hydronium bending                                               | 1688.0 | 1716.3 (+28.3)  | 1712.9 (+24.9)  |
| Hydronium asym. O-H stretching                                  | 2839.4 | 2710.1 (-129.3) | 2728.3 (-111.1) |
| Hydronium asym. O-H stretching                                  | 2839.7 | 2743.3 (-96.4)  | 2780.7 (-59.4)  |
| Hydronium sym. O-H stretching                                   | 2974.0 | 2933.1 (-40.9)  | 2952.2 (-18.8)  |
| Assignment                                                      | $Z$    | $(Co - Z)$      | $(Co - Z')$     |
| H <sub>2</sub> O...H <sup>+</sup> ...OH <sub>2</sub> bending    | 908.4  | 942.1 (33.7)    | 948.3 (39.9)    |
| H <sub>2</sub> O...H <sup>+</sup> ...OH <sub>2</sub> bending    | 999.6  | -               | -               |
| H <sub>2</sub> O...H <sup>+</sup> ...OH <sub>2</sub> bending    | 1058.5 | 1073.3 (14.8)   | 1030.7 (-27.8)  |
| H <sub>2</sub> O...H <sup>+</sup> ...OH <sub>2</sub> bending    | 1416.0 | 1287.0 (-129.0) | 1388.3 (-27.7)  |
| H <sub>2</sub> O...H <sup>+</sup> ...OH <sub>2</sub> bending    | 1581.9 | -               | 1613.3 (31.4)   |
| Water ligand bending                                            | 1633.0 | 1611.6 (-21.4)  | 1627.1 (-5.9)   |
| Water ligand bending                                            | 1636.5 | 1626.7 (-9.8)   | 1634.9 (-1.6)   |
| Shared-proton + 2H <sub>2</sub> O bending                       | 1697.8 | 1685.8 (-12.0)  | 1722.7 (24.9)   |
| Shared-proton + 2H <sub>2</sub> O bending                       | 1747.3 | 1715.1 (-32.2)  | 1865.9 (118.6)  |
| H-bonded sym. O-H stretching                                    | 2992.5 | 3002.0 (9.5)    | 2782.8 (-209.7) |
| H-bonded asym. O-H stretching                                   | 3033.3 | 3039.7 (6.4)    | 3137.7 (104.4)  |
| Assignment                                                      | $Z$    | $(Ca - Z)_U$    | $(Ca - Z)_N$    |
| H <sub>2</sub> O...H <sup>+</sup> ...OH <sub>2</sub> bending    | 908.4  | 928.8           | 950.0*          |
| H <sub>2</sub> O...H <sup>+</sup> ...OH <sub>2</sub> bending    | 999.6  | -               | 950.4           |
| H <sub>2</sub> O...H <sup>+</sup> ...OH <sub>2</sub> bending    | 1058.5 | -               | 1010.9          |
| H <sub>2</sub> O...H <sup>+</sup> ...OH <sub>2</sub> stretching | -      | 939.2           | -               |
| H <sub>2</sub> O...H <sup>+</sup> ...OH <sub>2</sub> stretching | -      | 1072.9          | -               |
| H <sub>2</sub> O...H <sup>+</sup> ...OH <sub>2</sub> bending    | 1416.0 | 1302.4          | 1402.8          |
| H <sub>2</sub> O...H <sup>+</sup> ...OH <sub>2</sub> bending    | 1581.9 | -               | 1448.5          |
| Water ligand bending                                            | 1633.0 | 1613.6          | 1611.5          |
| Water ligand bending                                            | 1636.5 | 1613.6          | 1619.8          |
| Shared-proton + 2H <sub>2</sub> O bending                       | 1697.8 | 1694.5 (-3.3)   | 1708.3 (+10.5)  |
| Shared-proton + 2H <sub>2</sub> O bending                       | 1747.3 | 1714.0 (-33.3)  | 1792.3 (+45.0)  |
| H <sub>2</sub> O...H <sup>+</sup> ...OH <sub>2</sub> bending    | -      | 1804.2          | -               |
| H-bonded sym. O-H stretching                                    | 2992.5 | 3043.3 (+50.8)  | 3097.8 (+105.3) |
| H-bonded asym. O-H stretching                                   | 3033.3 | 3012.7 (-20.6)  | 2873.6 (-159.7) |

\* Resonance with torsional motion of corannulene.

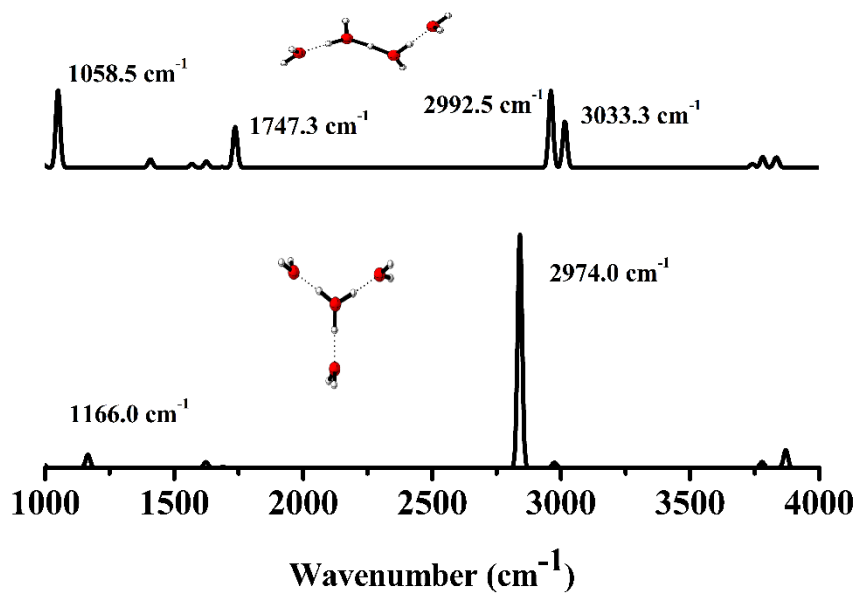

**Figure S5.** Calculated IR spectra of the isolated Zundel (top) and Eigen cations (bottom).

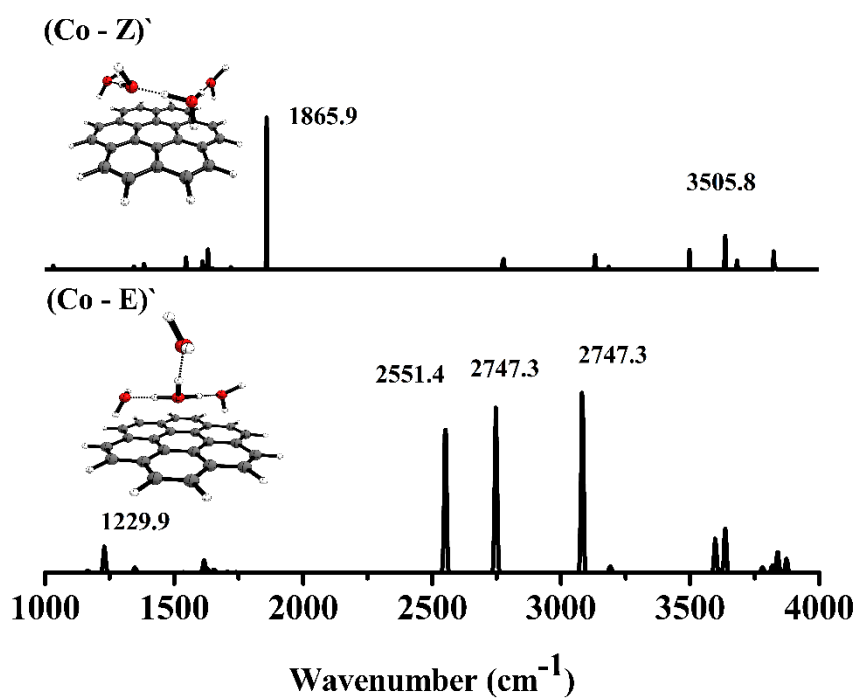

**Figure S6.** Calculated IR spectra of the  $(Co - Z)'$  (top) and  $(Co - E)'$  cations (bottom).

### Supplementary references

S1. E. R. Johnson, S. Keinan, P. Mori-Sánchez, J. Contreras-García, A. J. Cohen and W. Yang, *J. Am. Chem. Soc.*, **2010**, *132*, 6498–6506.

S2 C. T. Wolke, J. A. Fournier, L. C. Dzugan, M. R. Fagiani, T. T. Obadrakh, H. Knorke, K. D. Jordan, A. B. McCoy, K. R. Asmis and M. A. Johnson, *Science*, **2016**, *354*, 1131–1135.

S3 T. K. Esser, H. Knorke, K. R. Asmis, W. Schöllkopf, Q. Yu, C. Qu, J. M. Bowman and M. Kaledin, *J. Phys. Chem. Lett.*, **2018**, *9*, 798–803.
